# Supplementary material
Source: PubMed Central journal article supplement (PMC4433602)
Supplement: NIHMS676026-supplement-1.pdf [file NIHMS676026-supplement-1.pdf]

## Supplementary Figure Legends

**Figure S1.** Auto-phosphorylation of EGFR-A289V and EGFR-G598V can be inhibited by EGFR TKIs. (A) Murine *Ink4a/Arf*<sup>-/-</sup> *Pten*<sup>-/-</sup> astrocytes transduced with control, EGFR-A289V, EGFR-G598V or lung cancer mutant EGFR-L858R were serum starved for 24 hours followed by 4-hour treatment of vehicle (DMSO), 250 nM erlotinib or 50 nM gefitinib. Cell lysates were prepared and subjected to immunoblot analysis. (B) Cell lysates prepared from the EGFR-A289V and EGFR-G598V transduced cells treated as in (A) were immunoprecipitated with anti-EGFR antibody and subjected to immunoblot analysis with anti-phospho-tyrosine antibody (4G10).

**Figure S2.** *EGFR*\* expression is strongly induced in *hGFAP-tTA tetO-EGFR*\* off-Dox mouse brains. (A) Total RNAs were isolated from brain, skin, pancreas, intestine or liver of 12-week-old control *hGFAP-tTA* or *hGFAP-tTA tetO-EGFR*\* mice maintained either off- (-) or on- (+) Dox (n = 2 for each), and were subjected to qPCR for *EGFR*\* and  $\beta$ -Actin. Results were normalized with  $\beta$ -Actin expression and shown as mean  $\pm$  SD. (B) *EGFR*\* expression was induced in Gfap-positive cells along subventricular zone (SVZ) and brain parenchyma of off-Dox *hGFAP-tTA tetO-EGFR*\* bitransgenic mice. Shown are representative co-immunostaining of anti-EGFR and anti-Gfap on brain sections of 12-week-old *hGFAP-tTA tetO-EGFR*\* bitransgenic animals kept off- or on-Dox. Scale bar represents 100  $\mu$ m. (C) *EGFR*\* induction promoted SVZ neural precursor cell (NPC) expansion. Shown are representative images of brain sections of off- and on-Dox 12-week-old bitransgenic mice stained with H&E or anti-EGFR. The arrows indicate *EGFR*\*-expressing cells that were migrating into adjacent sub-striatum of cortical white matter. Scale bar represents 50  $\mu$ m.

**Figure S3.** Gfap and Nestin protein expression are overlapped in a subpopulation of NPCs along the lateral ventricles of mouse brain neurogenic SVZ regions but not in parenchymal astrocytes. Scale bar represents 50  $\mu\text{m}$ .

**Figure S4.** Representative H&E images of a Grade IV malignant glioma show secondary structures of Scherer - perineuronal (arrow heads), perivascular (arrows) satellitosis and supial collections in the cerebral cortex.

**Figure S5.** Malignant glioma cells do not express terminally differentiated CNS cell lineage markers. Representative sections from normal brains and malignant gliomas were stained with H&E or antibodies against mature oligodendrocyte marker Mbp or neuronal marker NeuN. Scale bar represents 50  $\mu\text{m}$ .

**Figure S6.** *iEIP* glioma subcutaneous transplants are sensitive to genetic suppression of *EGFR*\* induction but not to EGFR TKI. (A) Shown are representative images of tumor sections from the indicated treatment stained with H&E, anti-EGFR, or anti-phospho-EGFR. Note, *EGFR*\* phosphorylation but not *EGFR*\* protein levels were diminished in tumors subjected to erlotinib treatment. Scale bar represents 50  $\mu\text{m}$ . (B) Growth curve of subcutaneously grafted *iEIP* glioma cells treated with vehicle (n = 4), Dox (2 g/L in drinking water; n = 5) or erlotinib (50 mg/kg/d; n = 5). Day 0 represents the day when treatment was initiated. Tumor growth was measured at indicated time and calculated by relative change to the initial tumor volume. The data are presented as mean  $\pm$  SD. (C) Immunoblot analysis using tumor lysates prepared from indicated treatment groups revealed efficient inhibition of *EGFR*\* phosphorylation by erlotinib treatment.

**Figure S7.** *iEIP* gliomas are sensitive to acute *EGFR*\* ablation. Tumor bearing animals grafted with GFP-expressing *iEIP* glioma cells were switched to Dox and sacrificed at indicated time-points. H&E and IHC staining against EGFR and phospho-Akt (p-Akt) revealed rapid

downregulation of EGFR\* protein expression as well as gradually decreased tumor cellularity and phospho-Akt levels in response to Dox treatment. Scale bars represent 50  $\mu$ m.

**Figure S8.** Ingenuity pathway analysis comparing gene expression profiling of untreated control tumors (n = 3) with Dox-treated relapsed tumors (n = 3) reveals pathway enrichment related to hepatic fibrosis/hepatic stellate cell activation.

**Figure S9.** Combined treatment of Dox and Bez-235 inhibits EGFR\* induction and Akt activation. Mice with subcutaneously grafted *iEIP* glioma cells were treated with vehicle, Bez-235 (45 mg/kg/day), Dox (2 g/L in drinking water), or Dox + Bez-235. Note, Bez-235 inhibited Akt activation in tumors treated with Bez-235 and Dox + Bez-235, and focally patched Met activation was detected in relapsed tumors from Dox and Dox + Bez-235 treatment. Scale bars represent 50  $\mu$ m.

## Supplementary Experimental Procedures

### Complete Materials and Methods

#### *Mice*

The *hGFAP-tTA tetO-EGFR\** mice were intercrossed with *cInk4a/Arf<sup>Lox/Lox</sup> cPten<sup>Lox/Lox</sup> Nestin-CreER<sup>T2</sup>* and maintained under Dox (2 g/L, in drinking water) during breeding period until 4-week-old age. Genotyping was done using standard PCR using following primers: for detection of *cInk4a/Arf<sup>Lox/Lox</sup>* primer 5'-TTG TTG GCC CAG GAT GCC GAC ATC-3' and 5'-CCA AGT GTG CAA ACC CAG GCT CC-3' resulting in ~180bp Lox allele or ~140bp Wild type allele; *cPten<sup>Lox/Lox</sup>* 5'-CTT CGG AGC ATG TCT GGC AAT GC-3', 5'- CTG CAC GAG ACT AGT GAG ACG TGC-3' and 5'-GGT AGG TCT TGG ATG TTC TCA G-3' resulting in a ~1000bp

Lox allele or 811 bp wild type allele; *Nestin-CreER<sup>T2</sup>* 5'- CCT GGA AAA TGC TTC TGT CCG-3' and 5'- CAG GGT GTT ATA AGC AAT CCC-3' resulting in a ~400bp allele; *hGFAP-tTA* 5'- CGC TGT GGG GCA TTT TAC TTT AG-3' and 5'- CAT GTC CAG ATC GAA ATC GTC -3' resulting in a ~450bp allele; *tetO-EGFR\** 5'- GGGCTCTGGAGGAAAAGAAA-3' and 5'- AGGCCCTTCGCACTTCTTAC-3' resulting in a ~150bp.

4-6 week-old immunocompromised Nu/Nu mice were purchased from Charles River. All procedures for mouse experiments were reviewed and approved by the Cold Spring Harbor Laboratory Institutional Animal Care and Use Committee (IACUC).

### ***Drug Formulation***

Tamoxifen (TMX) (Sigma Aldrich, T5648) was solved in 10% ethanol 90% sun flower oil. 4-week-old experimental mice were administered with TMX (124 mg/kg body weight) intraperitoneal for 5 consecutive days. Doxycycline was purchased from Research Products International (D43020) and solved in tap water with 2% Sucrose and sterile filtered. Erlotinib (LC Laboratories, E-4007) was solved in phosphate buffer saline (PBS) with 0.5% Methylcellulose (Sigma Aldrich, M7027) and 0.4% TWEEN80 (Sigma Aldrich, P4780) at a concentration of 10 mg/ml. Gefitinib (LC Laboratories, G-4408) was solved in PBS with 1% TWEEN80 at a concentration of 25 mg/ml. Crizotinib (LC Laboratories, C-7900) was solved in sterile water at a concentration of 10 mg/ml (1). Bez-235 (LC Laboratories, N-4288) was prepared fresh daily in 10% 1-Methyl-2-pyrrolidinone (Sigma Aldrich, 49449) and 90% Polyethylene Glycol 300 (Sigma Aldrich, 90878) (2). Erlotinib (50 mg/kg/day), gefitinib (150 mg/kg/day), crizotinib (25mg/kg/day) and Bez-235 (45 mg/kg/day) were administered through oral gavage.

### ***Orthotopic and Subcutaneous Grafting Experiments***

Low passage iEIP glioma cells were maintained under proliferation conditions in neural basal media containing 20 ng/ml EGF (Sigma Aldrich, E4127) and 10 ng/ml bFGF (Gibco, PMG0035) and retrovirally transduced with either luciferase and/or GFP. The orthotopic transplantation was performed as described previously (3). In brief, immunocompromised Nu/Nu mice were anesthetized and restraint using a stereotaxic instrument (Stoelting, 51725), a small hole was drilled into the skull with a dental drill 0.5 mm anterior and 1.5 mm lateral from the bregma. 10,000 *iEIP* glioma cells in Hank's balanced salt solution (Gibco, 24020) were injected into the right caudate nucleus 3 mm below the surface of the brain using a 10- $\mu$ l Hamilton syringe with an unbeveled 30 gauge needle. The scalp was closed using a 9-mm Autoclip Applier. Animals were followed daily for development of neurological deficits. For subcutaneous grafting, *iEIP* glioma cells were resuspended in 30% BD Matrigel (BD Biosciences, 354234) in Hank's balanced salt solution and ~200,000 cells were injected in each flank of immunocompromised Nu/Nu mice. Tumor growth was monitored and measured every three days by Caliper measurement, and tumor volume was calculated by the following formula:  $V = \frac{4\pi}{3} * \frac{a * b * c}{2 * 2 * 2}$  (V - tumor volume; a- tumor length; b - tumor width; c - tumor height). Relative tumor volume change was calculated by dividing tumor volume by initial tumor volume.

### ***Immunohistochemical and Immunofluorescence Staining***

Paraffin embedded mouse brains or subcutaneously grafted tumors were deparaffinized and rehydrated. Endogenous peroxidases were blocked by incubation with 3% H<sub>2</sub>O<sub>2</sub> in PBS followed by antigen retrieval using heat induced pH 6 citrate buffer protocol. Antibodies used were EGFR (Bethyl, IHC0005, 1:250), EGFR (Upstate, 06-129, 1:300), p-EGFR (Y1173, Cell Signaling, 4407, 1:100), Ki67 (Vector Laboratories, VP-K452, 1:100), Gfap (Dako, Z0334, 1:2000), Gfap (BD Bioscience, BD556330, 1:50), Pten (Cell Signaling, 9559, 1:100), activated Caspase 3 (Cell

Signaling, 9661, 1:150), p-Akt (Cell Signaling, 4060, 1:200), p-Mapk (Cell Signaling, 4370, 1:500), p-Met (Cell Signaling, 3077, 1:100), pStat3 (Cell Signaling, 9145, 1:200), Nestin (Millipore, MAB353, 1:100), Olig2 (Chemicon, AB9610, 1:400), Tuj1 (Covance, MMS-43-435P, 1:400), GFP (Abcam, AB13970, 1:300), Mbp (Abcam, 7349, 1:200), O4 (Millipore, MAB345, 1:100), NeuN (Millipore, MAB377, 1:100). The secondary antibodies used for IHC staining were: goat anti-rabbit (Vector Laboratories ABC Elite kit rabbit PK-6101), goat-anti chicken (Vector Laboratories, BA9010). For mouse primary antibodies, Vector Laboratories MOM kit (Vector Laboratories, PK-2200) was used according to manufactures recommendations. Antibody staining was visualized with Vector Laboratories DAB kit (SK-4100) according to manufacturer's recommendations. The secondary antibodies used for IF staining were: Alexa 488 nm anti-rabbit (Invitrogen, A10042, 1:500), Alexa 568 nm anti-mouse (Invitrogen, A-21202, 1:500), Alexa 488 nm anti-chicken (Invitrogen, A-11039, 1:500), Alexa 568 nm anti-sheep (Invitrogen, A-21099, 1:500).

### ***Western Blotting***

Total protein was isolated from mouse brains or subcutaneously grafted iEIP tumors using RIPA buffer (150 mM NaCl, 50 mM Tris, 0.5% Na-Deoxycholate, 0.1% SDS and 1% NP-40). Protein concentration was determined by Bradford Assay (Bio-Rad Protein Assay Dye Reagent Concentrate, 500-0006). Proteins were separated on Nupage Novex 4-12% Bis-Tris Gel and blotted on PVDF membrane (Bio-Rad, 162-0177). Blots were blocked with 5% dry milk powder in Tris buffered saline supplemented with 0.2% TWEEN20 (TBST). Primary antibodies were diluted in TBST as:  $\beta$ -Actin (Santa Cruz, sc-1615) 1:1000, p-EGFR 1:1000 (Y1068, Cell Signaling, 3777), EGFR 1:2000 (Santa Cruz, sc-03), p-Akt 1:2000, Akt (Cell Signaling, 9272) 1:1000; p-S6 (Cell Signaling, 5364) 1:2000), S6 (Cell Signaling, 2317) 1:500. Secondary

antibodies donkey anti-rabbit HRP (Santa Cruz, sc-2077), donkey anti-mouse HRP (Santa Cruz, sc-2096) and donkey anti-goat HRP (SantaCruz, sc-2056) were diluted 1:2000 in 5% dry milk/TBST and incubated for 45 minutes at room temperature, antibody signal was detected by Western Lightning ECL Pro (Perkin Elmer, NEL120001EA)

### ***Immunoprecipitation***

Total protein lysates were prepared from murine astrocytes using IP buffer (150mM NaCL, 20mM HEPES, 1% NP-40) supplemented with complete mini protease inhibitor cocktail (Roche, 1836153), PhosStop phosphatase inhibitor (Roche, 4906845001) and 200 $\mu$ M Na<sub>3</sub>VO<sub>4</sub>. Protein concentration was determined by Bradford Assay. To immunoprecipitate EGFR protein, EGFR antibody (Santa Cruz, sc-03, 1:200) was added to total protein lysate and incubated for 2 hours at 4°C, then 50 $\mu$ l protein A/G PLUS-agarose beads (Santa Cruz, sc-220) were added and incubated at 4°C for 2 hours. For p-Y immunoprecipitation, 30 $\mu$ l pre-conjugated anti-phosphotyrosine agarose beads (Sigma Aldrich, A1806) were added to total protein lysate and rotated overnight at 4°C. Precipitates were subjected to SDS-PAGE and Western Blot analysis as described earlier. Phospho-tyrosine proteins were detected by using monoclonal mouse primary anti-phospho-tyrosine antibody 4G10 (Millipore, 05-321) 1:5000. EGFR protein was detected with primary anti-EGFR antibody (Santa Cruz, sc-03) 1:1000.

### ***Quantitative Real Time PCR***

Total RNA was isolated using RNeasy Mini kit (Qiagen, 74104) and concentration was determined by NanoDrop followed by reverse transcription of 2  $\mu$ g total RNA using SuperScript VILO cDNA Synth Kit (Applied Biosystems, 4453650). Real time qPCR was performed on Applied Biosystems StepOne plus 96-well PCR System according to manufacturer's recommendations. The primer sequences are:

| Gene    | Forward<br>5'→3'            | Reverse<br>5'→3'           | Amplicon<br>bp |
|---------|-----------------------------|----------------------------|----------------|
| β-Actin | GGCTGTATTCCCCTCCATCG        | CCAGTTGGTAACAATGCC<br>ATGT | 241            |
| Hgf     | ACTTCTGCCGGTCCTGTTG         | CCCCTGTTCTGATACACC<br>T    | 222            |
| Met     | GTGAACATGAAGTATCAGC<br>TCCC | TGTAGTTTGTGGCTCCGAG<br>AT  | 100            |
| EGFR*   | GGGCTCTGGAGGAAAAGA<br>AA    | AGGCCCTTCGCACTTCTTA<br>C   | 150            |

## REFERENCES

1. Christensen JG, Zou HY, Arango ME, Li Q, Lee JH, McDonnell SR, et al. Cyto-reductive antitumor activity of PF-2341066, a novel inhibitor of anaplastic lymphoma kinase and c-Met, in experimental models of anaplastic large-cell lymphoma. *Molecular cancer therapeutics*. 2007;6:3314-22.
2. Maira SM, Stauffer F, Brueggen J, Furet P, Schnell C, Fritsch C, et al. Identification and characterization of NVP-BEZ235, a new orally available dual phosphatidylinositol 3-kinase/mammalian target of rapamycin inhibitor with potent in vivo antitumor activity. *Molecular cancer therapeutics*. 2008;7:1851-63.



3. Zheng H, Ying H, Yan H, Kimmelman AC, Hiller DJ, Chen AJ, et al. p53 and Pten control neural and glioma stem/progenitor cell renewal and differentiation. *Nature*. 2008;455:1129-33.
