# Supplementary material
Source: PubMed Central journal article supplement (PMC4433602)

# Figure S1

## A

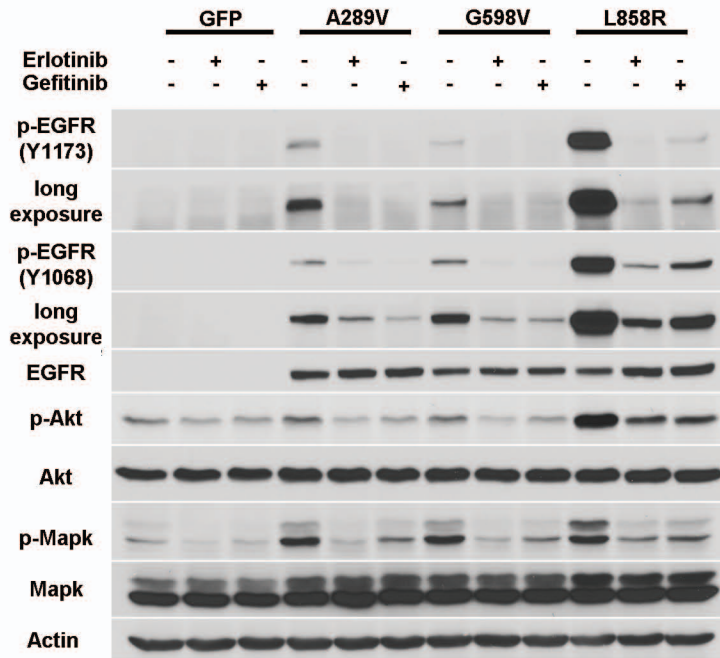

## B

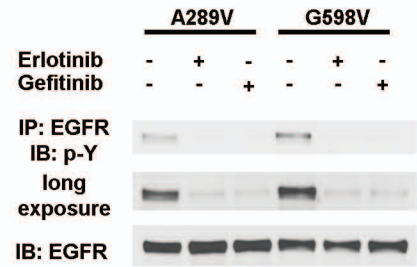

# Figure S2

## A

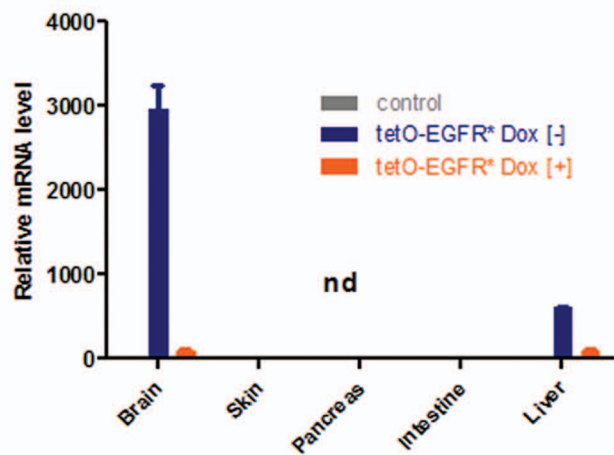

## B

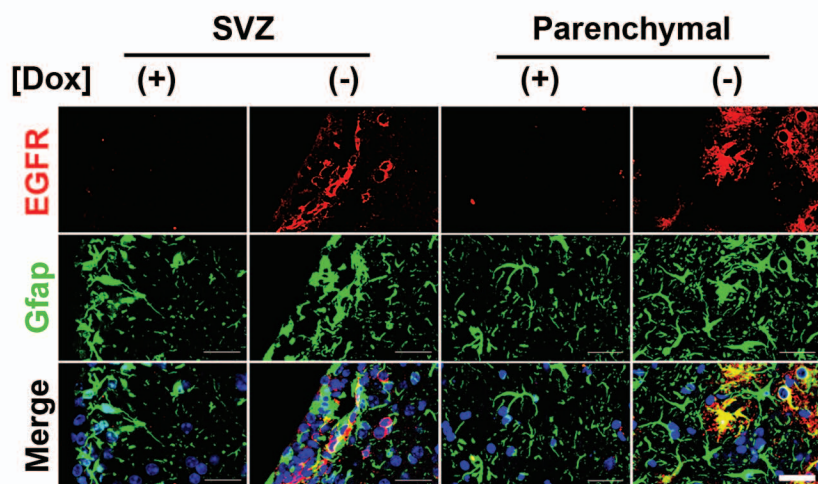

## C

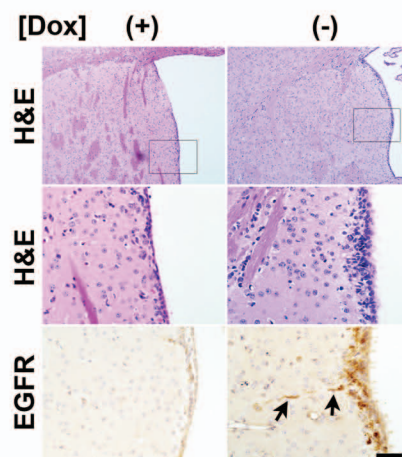

# Figure S3

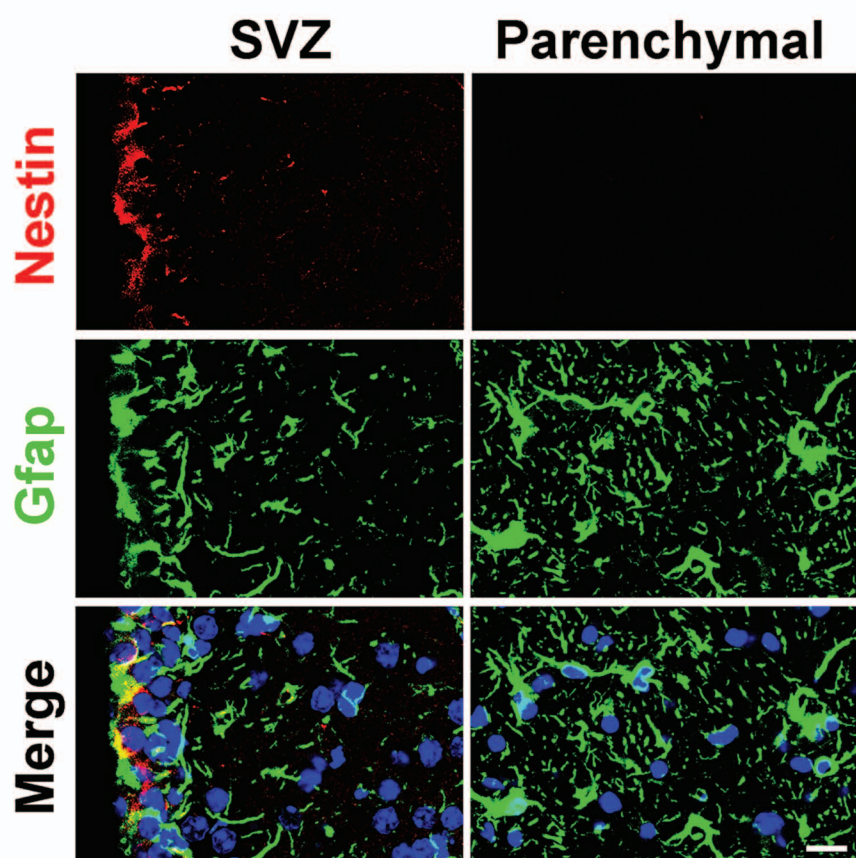

**Figure S4**

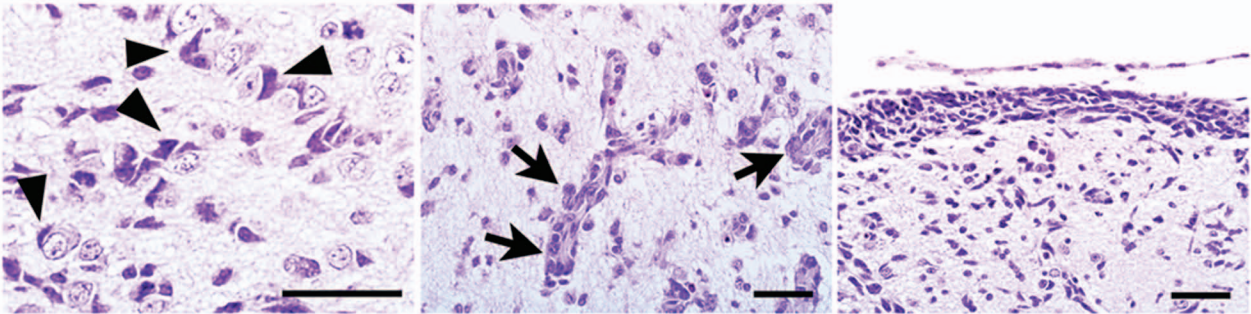

# Figure S5

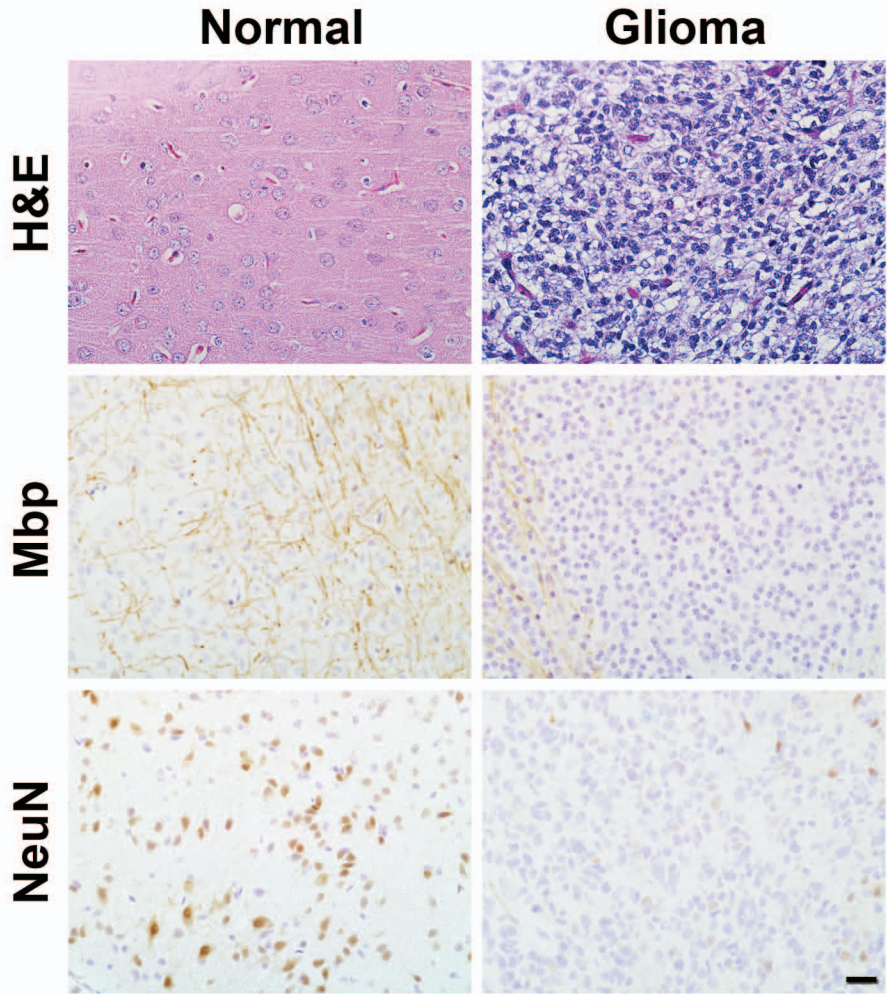



# Figure S7

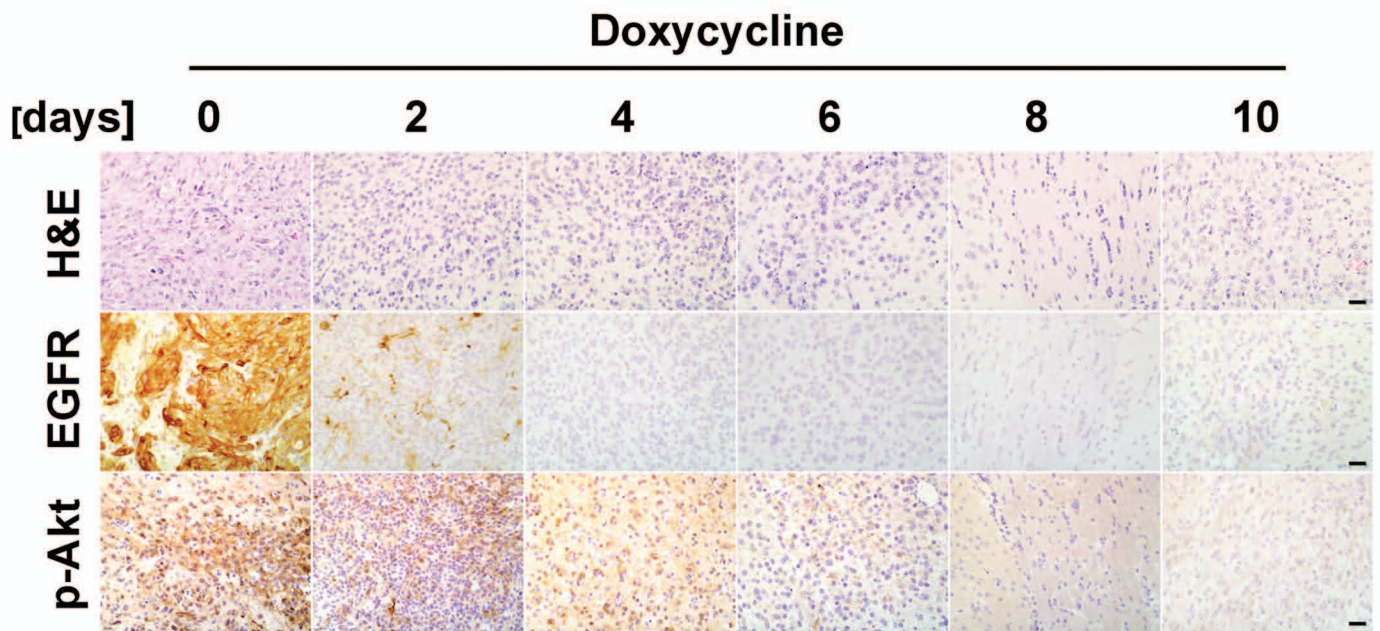

# Figure S8

Analysis: limma\_res - fc1

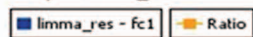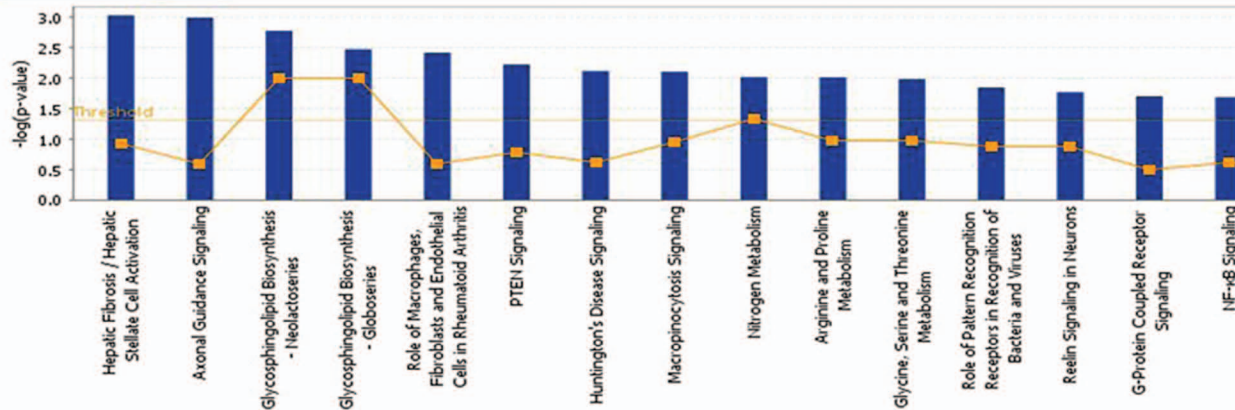

© 2000-2012 Ingenuity Systems, Inc. All rights reserved.



# Figure S9

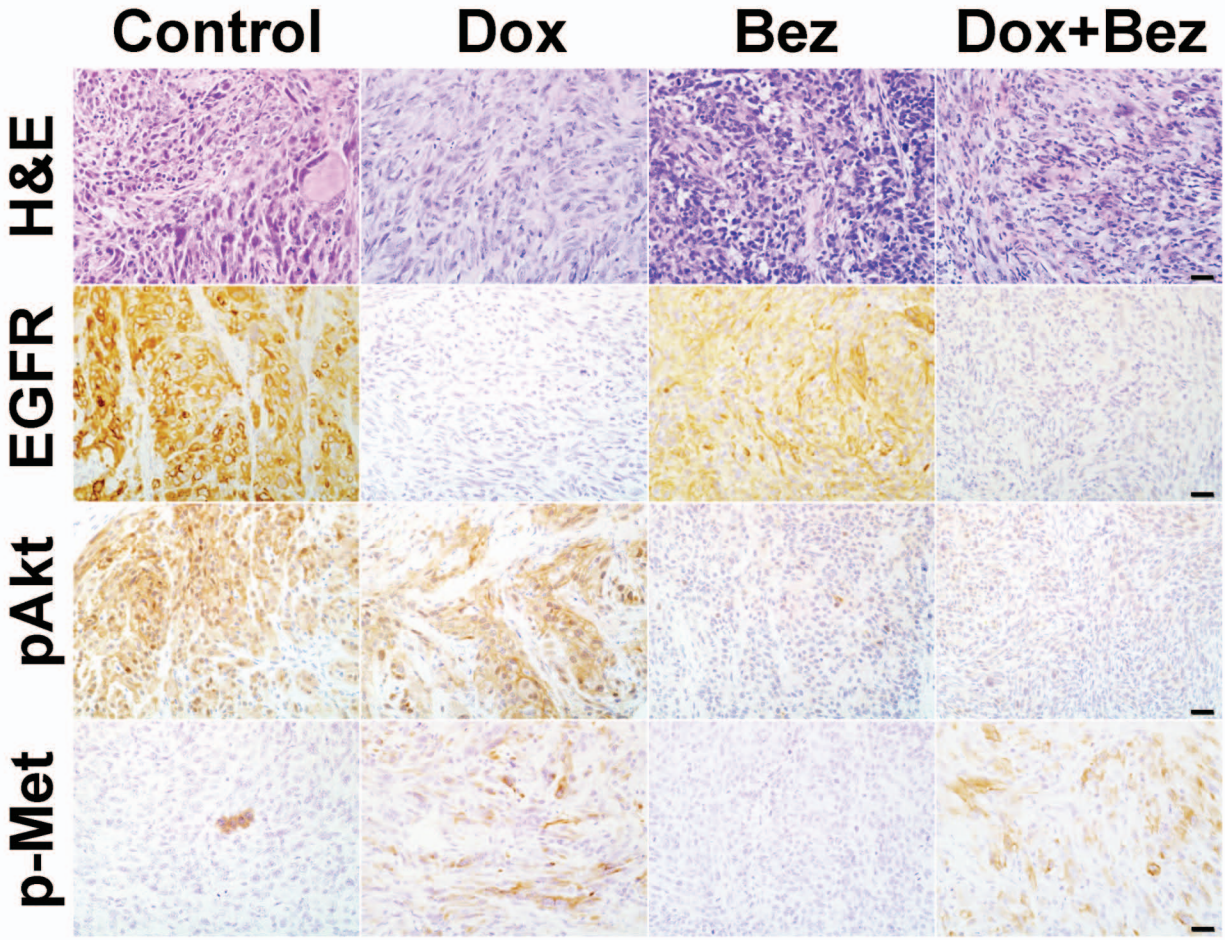

Supplement: NIHMS676026-supplement-2.pdf [file NIHMS676026-supplement-2.pdf]
